# Supplementary material for: Evaluation of Ten Fresh Snow Density Parameterization Schemes for Simulating Snow Depth and Surface Energy Fluxes on the Eastern Tibetan Plateau
Source: MDPI journal article supplement (doi:10.3390/atmos14101571), 2023-10-16
Supplement: s1 [file s1]

# Evaluation of Ten Fresh Snow Density Parameterization Schemes for Simulating Snow Depth and Surface Energy Fluxes on the Eastern Tibetan Plateau

Wenjing Li <sup>1,2</sup>, Siqiong Luo <sup>1,\*</sup>, Jingyuan Wang <sup>1</sup> and Yuxuan Wang <sup>1,3</sup>

## 1.1 Supplementary Figures

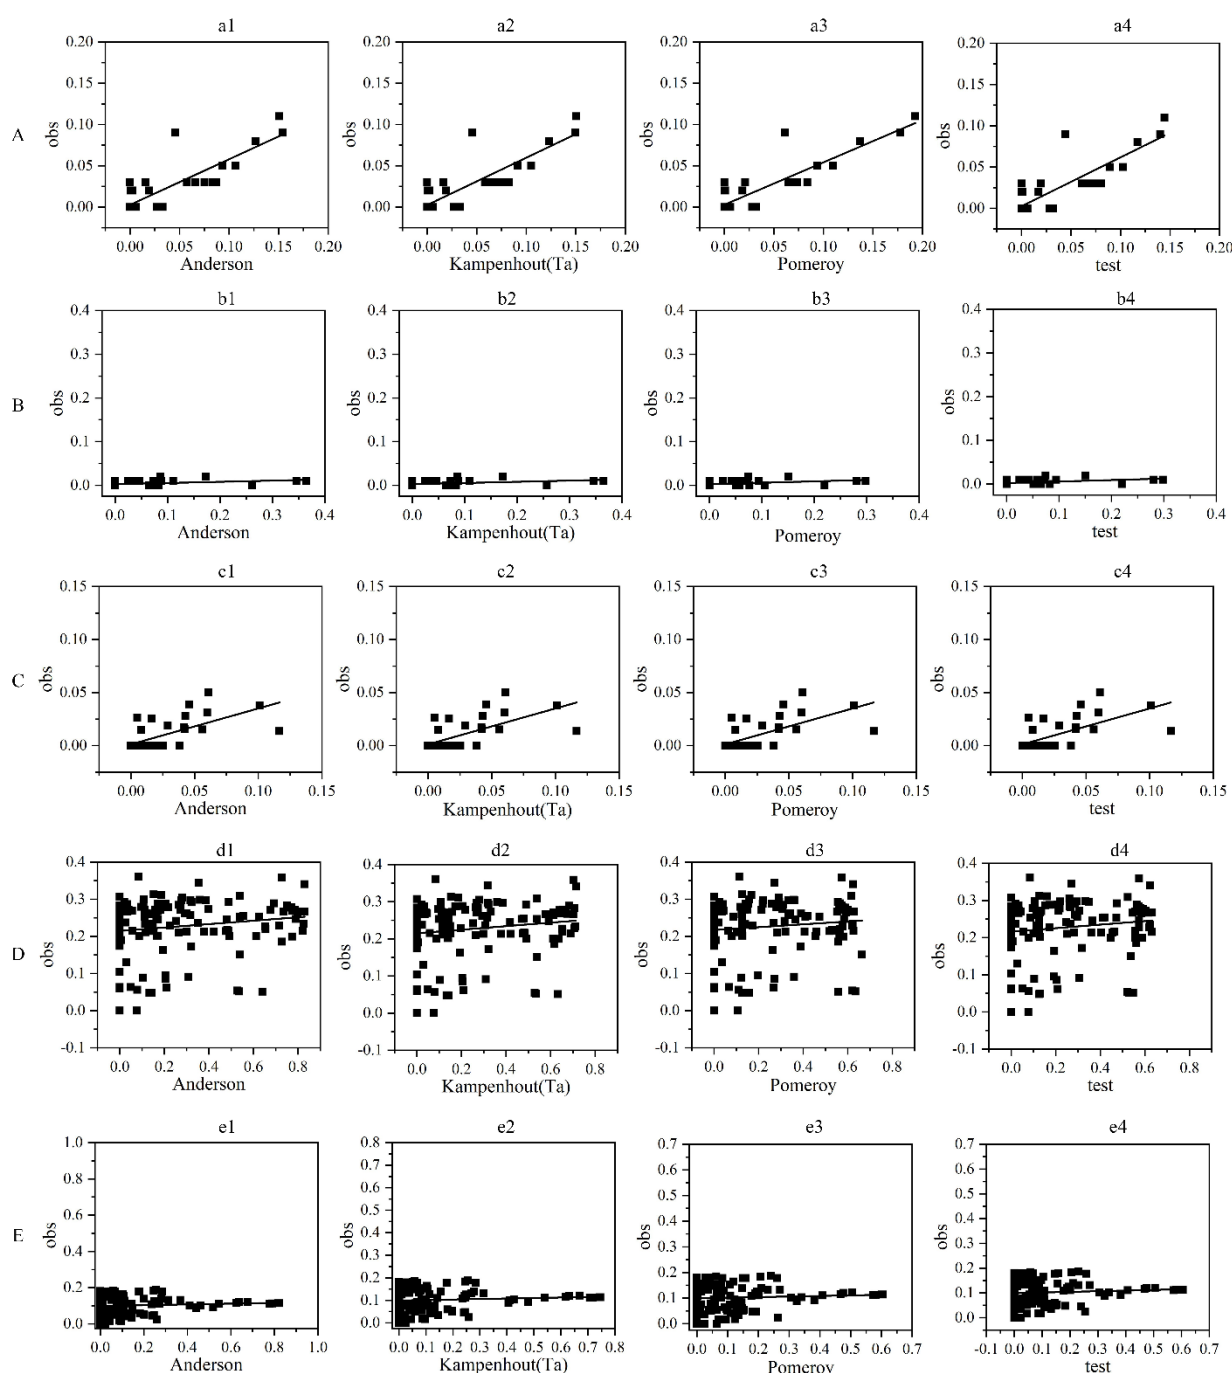

**Figure S1.** Scatter diagram of snow depth between simulated and observed values using the parameterized schemes related to temperature.

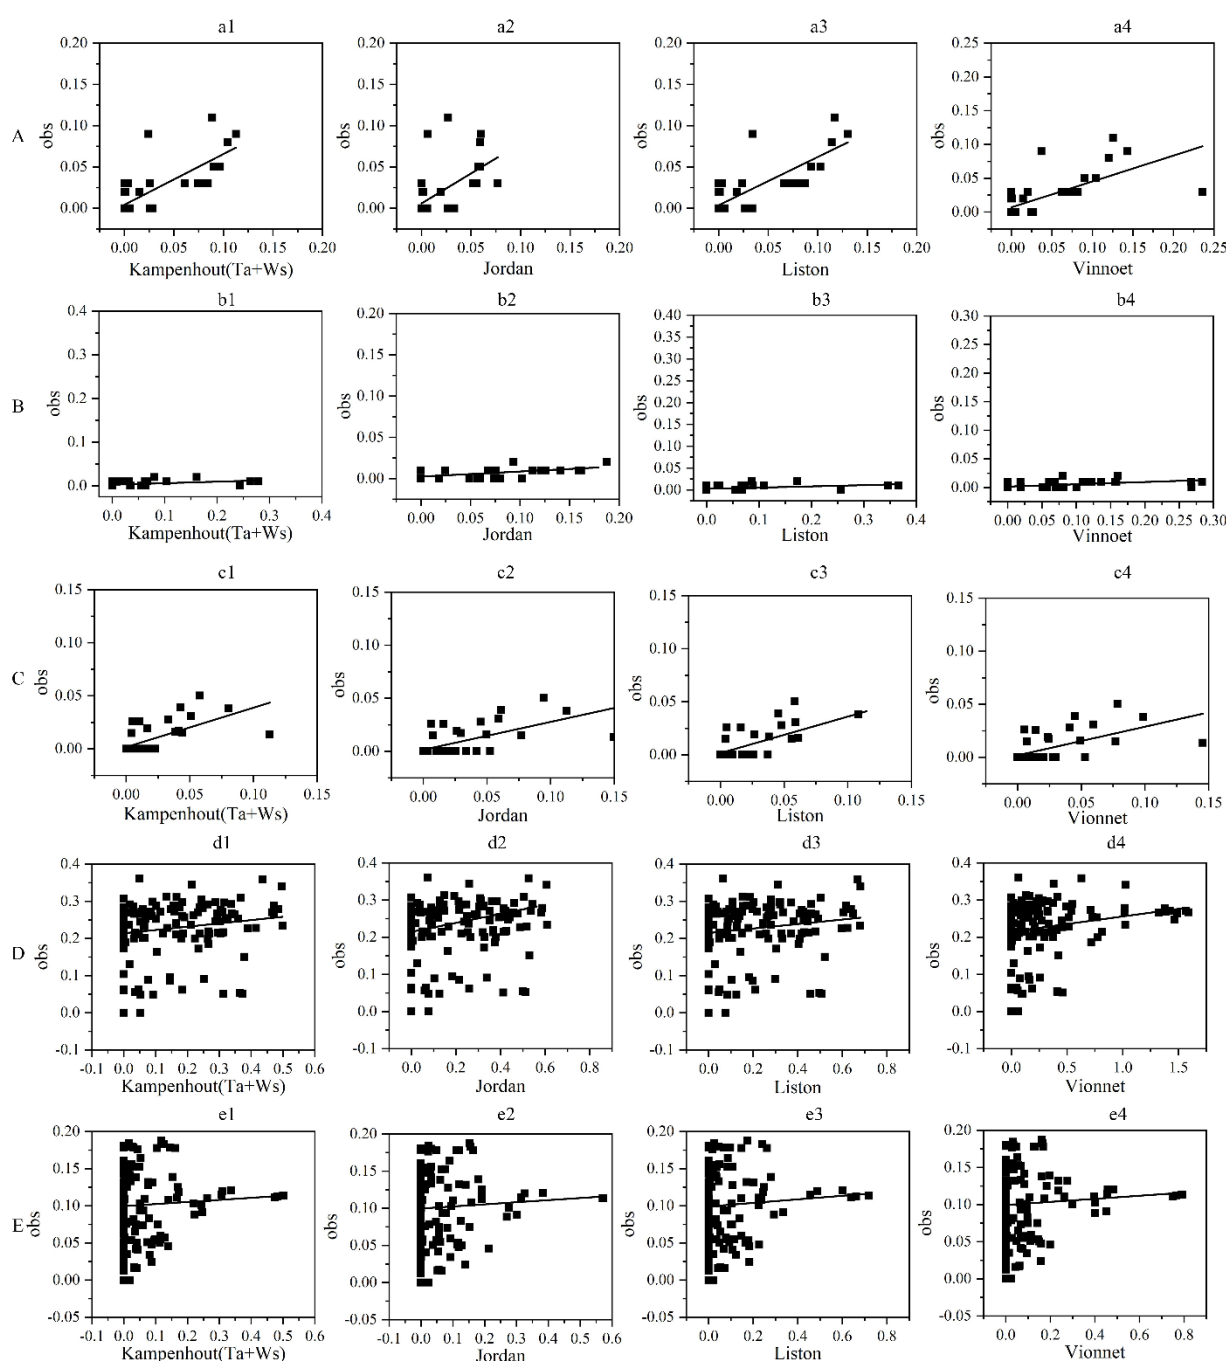

**Figure S2.** Scatter diagram of snow depth between simulated and observed values using the parameterized schemes related to temperature and wind speed.

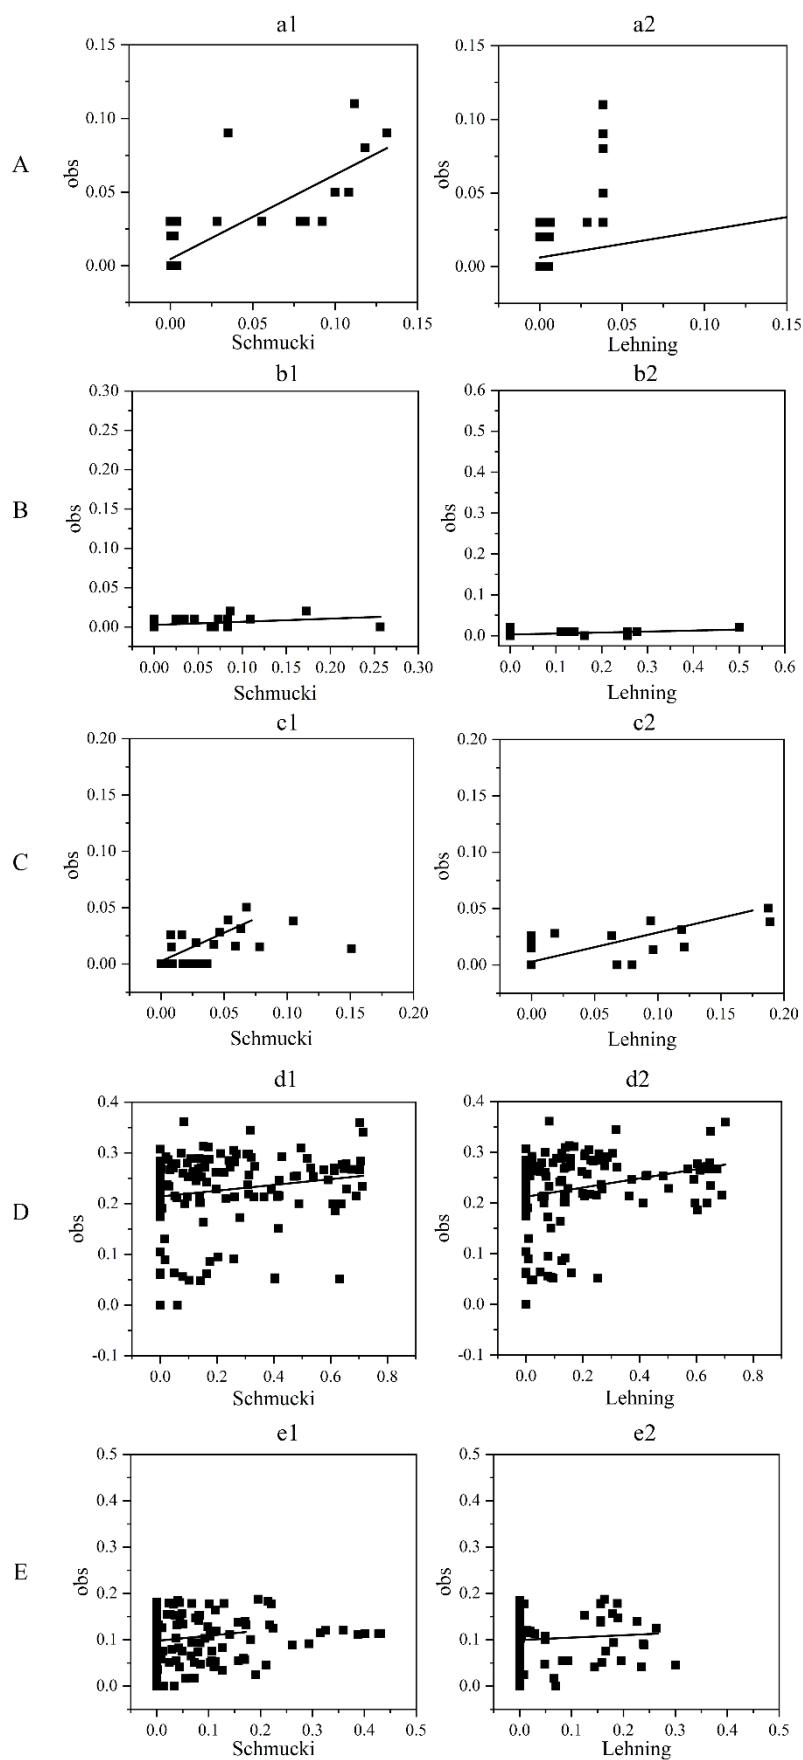

**Figure S3.** Comparison of snow depth between simulated and observed values using four parameterized schemes related to temperature, wind speed and relative humidity.

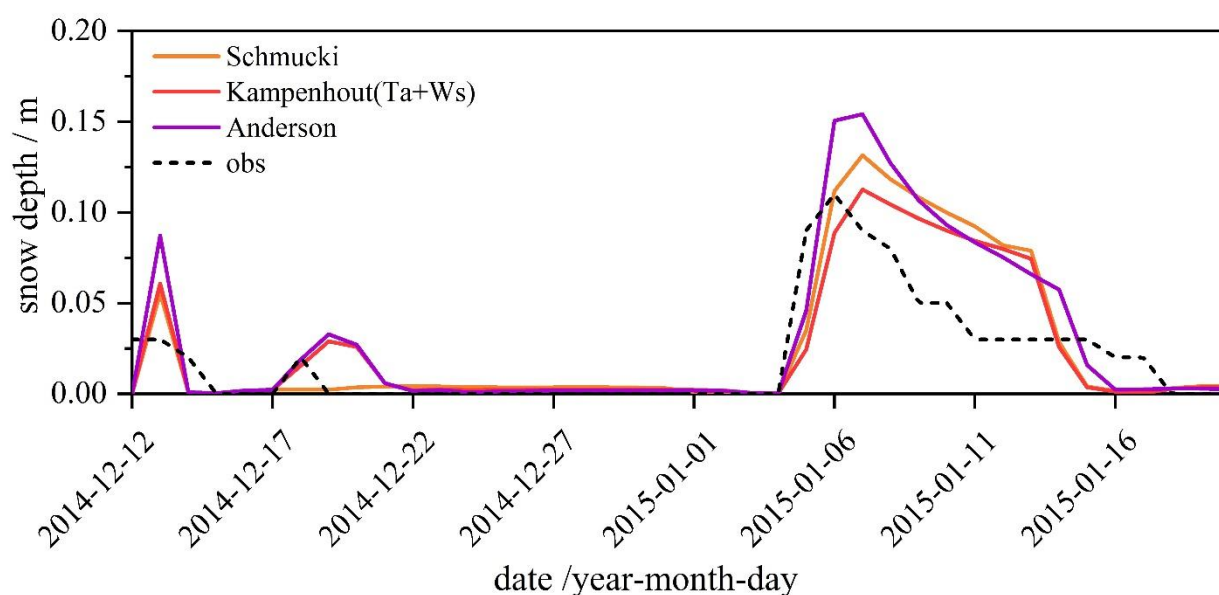

**Figure S4.** Comparison of snow depth between simulated and observed values using three schemes at Maqu.

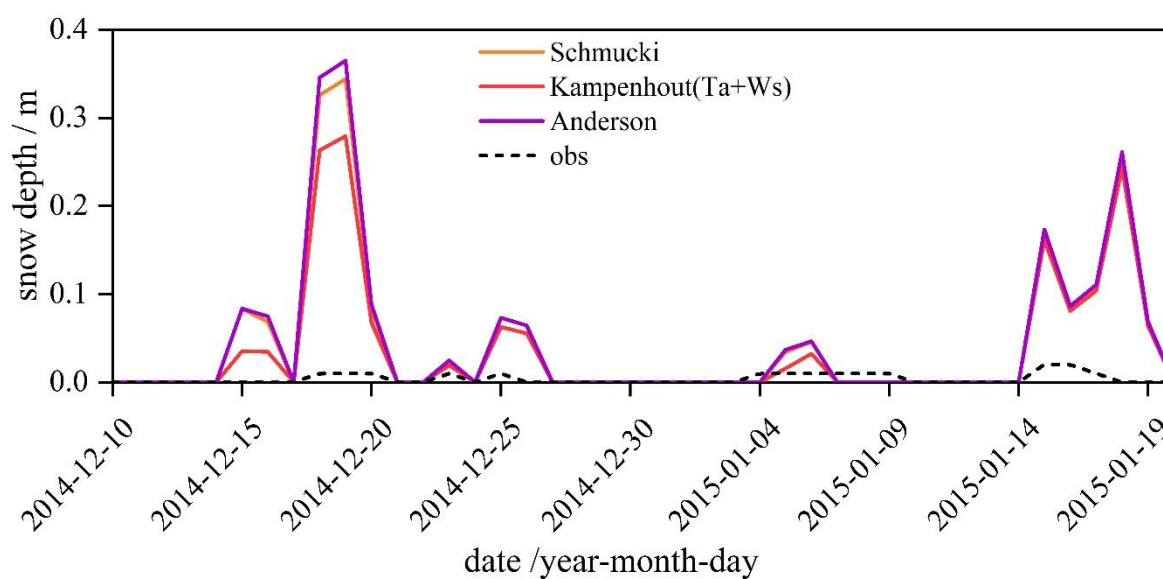

**Figure S5.** Comparison of snow depth between simulated and observed values using three schemes over short periods at Madoi.

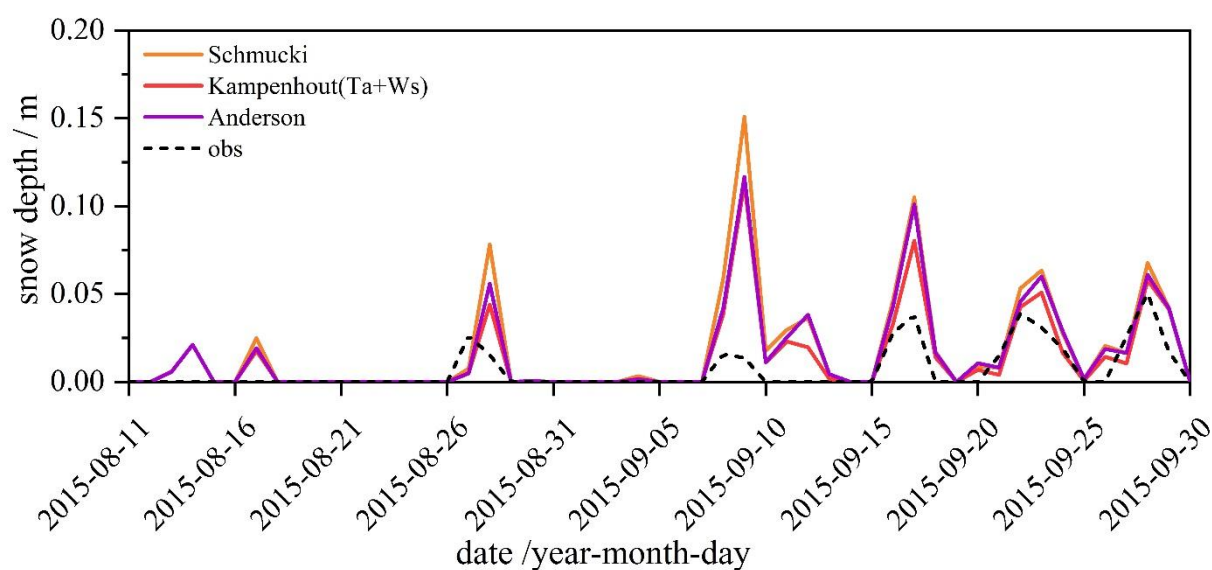

**Figure S6.** Comparison of snow depth between simulated and observed values using schemes over short periods of time at Yakou.

## 1.2 Supplementary Tables

**Table S1.** The observation items and instruments' heights at stations.

| Stations | Items                        | Instruments      | Height                          |
|----------|------------------------------|------------------|---------------------------------|
| Maqu     | Air temperature              | CR3000           | 3 m                             |
|          | Wind speed/direction         | CSAT3            | 3.2 m                           |
|          | Radiation flux               | CNR-1            | 1.5 m                           |
|          | Soil heat flux               | HFP01            | -5 cm                           |
|          | Soil temperature             | 107L             | -2.5,-5,-10,-20,-40,-80,-160 cm |
|          | Soil moisture content        | CS616            | -2.5,-5,-10,-20,-40,-80,-160 cm |
| Madoi    | Air temperature              | CR3000           | 3.2 m                           |
|          | Wind speed/direction         | CSAT3            | 3.2 m                           |
|          | Radiation flux               | CNR-1            | 1.5 cm                          |
|          | Soil heat flux               | HFP01            | -5 cm                           |
|          | Infrared surface temperature | SI-111           | 0 cm                            |
|          | Soil temperature             | 109L             | -5,-10,-20,-40,-80,-160,-320 cm |
|          | Soil moisture content        | CS616            | -5,-10,-20,-40,-80,-160,-320 cm |
| Yakou    | Snow depth                   | SR50A ultrasonic |                                 |
|          | Air temperature              | HMP45C           | 5 m                             |
|          | Wind speed/direction         | CSAT3            | 10 m                            |
|          | Radiation flux               | CNR4; CNR1       | 6 m(10 min); 1.5 m(30 min)      |

|                       |                  |                              |
|-----------------------|------------------|------------------------------|
| Soil heat flux        | HFP01            | -6 cm                        |
| Soil temperature      | 109L             | 0,-4,-10,-20,-40,-80,-160 cm |
| Soil moisture content | CS616            | -4,-10,-20,-40,-80,-160 cm   |
| Snow depth            | SR50A ultrasonic |                              |

**Table S2.** Comparison of annual average snow-cover days and mean daily snow depth on the TP.

| Area  | The period<br>of time | Annual average<br>snow- covered days | Mean daily<br>snow depth | References         |
|-------|-----------------------|--------------------------------------|--------------------------|--------------------|
| TP    | 1961-2014             | 23.78 d                              | 0.26 cm                  | Jiang et al., 2020 |
|       | 1961-2010             | 24.65 d                              | 0.25 cm                  | Xu et al., 2017    |
| Maqu  | 2014-2017             | 24.75 d                              | 0.18 cm                  | Li et al., 2021    |
| Madoi | 2014-2017             | 49.25 d                              | 0.24 cm                  | Li et al., 2021    |
| Yakou | 2014-2017             | 211 d                                | 4.05 cm                  | Li et al., 2021    |

**Table S3.** Initial values of soil temperature, moisture and soil composition at Maqu.

| Layer | z <sub>h</sub> (m) | Δz (m) | Depth<br>z <sub>h</sub> (m) | Temp-<br>erature<br>(°C) | Moistu-<br>re<br>(m <sup>3</sup> /m <sup>3</sup> ) | Ice<br>content<br>(m <sup>3</sup> /m <sup>3</sup> ) | Sand<br>(%) | Clay<br>(%) | Organic<br>(kg/m <sup>3</sup> ) |
|-------|--------------------|--------|-----------------------------|--------------------------|----------------------------------------------------|-----------------------------------------------------|-------------|-------------|---------------------------------|
| 1     | 0.0071             | 0.0175 | 0.0175                      | -7.48                    | 0.09                                               | 5.14                                                | 32.1        | 10.84       | 50.4                            |
| 2     | 0.0279             | 0.0276 | 0.0451                      | -4.48                    | 0.09                                               | 6.58                                                | 32.55       | 10.64       | 46.85                           |
| 3     | 0.0623             | 0.0455 | 0.0906                      | -2.71                    | 0.09                                               | 9.18                                                | 33.06       | 10.35       | 41.04                           |
| 4     | 0.1189             | 0.0750 | 0.1655                      | -1.30                    | 0.095                                              | 8.94                                                | 33.27       | 9.98        | 31.56                           |
| 5     | 0.2122             | 0.1236 | 0.2891                      | -0.03                    | 0.2                                                | 1.13                                                | 31.91       | 9.63        | 16.22                           |
| 6     | 0.3661             | 0.2038 | 0.4929                      | 1.17                     | 0.21                                               | 0                                                   | 24.98       | 9.79        | 16.22                           |
| 7     | 0.6198             | 0.3360 | 0.8289                      | 2.33                     | 0.15                                               | 0                                                   | 24.98       | 9.79        | 16.22                           |
| 8     | 1.0380             | 0.5539 | 1.3828                      | 3.46                     | 0.095                                              | 0                                                   | 24.98       | 9.79        | 16.22                           |
| 9     | 1.7276             | 0.9133 | 2.2961                      | 4.57                     | 0.06                                               | 0                                                   | 24.98       | 9.79        | 0                               |
| 10    | 2.8646             | 1.5058 | 3.8019                      | 5.68                     | 0.05                                               | 0                                                   | 24.98       | 9.79        | 0                               |

**Table S4.** Initial values of soil temperature, moisture and soil composition at Madoi.

| Layer | z <sub>h</sub> (m) | Δz(m)  | Depth<br>z <sub>h</sub> (m) | Temperature<br>(°C) | Moisture<br>(m <sup>3</sup> /m <sup>3</sup> ) | Sand<br>(%) | Clay<br>(%) | Organic<br>(kg/m <sup>3</sup> ) |
|-------|--------------------|--------|-----------------------------|---------------------|-----------------------------------------------|-------------|-------------|---------------------------------|
| 1     | 0.0071             | 0.0175 | 0.0175                      | -3.26               | 0.19                                          | 38.64       | 26.96       | 85.00                           |
| 2     | 0.0279             | 0.0276 | 0.0451                      | -1.55               | 0.15                                          | 38.64       | 26.96       | 75.12                           |
| 3     | 0.0623             | 0.0455 | 0.0906                      | -0.54               | 0.12                                          | 68.60       | 14.21       | 40.14                           |
| 4     | 0.1189             | 0.0750 | 0.1655                      | 0.27                | 0.11                                          | 65.41       | 21.28       | 31.37                           |
| 5     | 0.2122             | 0.1236 | 0.2891                      | 0.99                | 0.09                                          | 65.41       | 21.28       | 18.14                           |
| 6     | 0.3661             | 0.2038 | 0.4929                      | 1.67                | 0.07                                          | 94.03       | 3.44        | 1.92                            |

|    |        |        |        |      |      |       |      |      |
|----|--------|--------|--------|------|------|-------|------|------|
| 7  | 0.6198 | 0.3360 | 0.8289 | 2.33 | 0.06 | 93.42 | 2.69 | 1.18 |
| 8  | 1.0380 | 0.5539 | 1.3828 | 2.98 | 0.0  | 94.17 | 3.97 | 1.10 |
| 9  | 1.7276 | 0.9133 | 2.2961 | 3.62 | 0.02 | 94.17 | 3.97 | 0.00 |
| 10 | 2.8646 | 1.5058 | 3.8019 | 4.25 | 0.01 | 91.52 | 4.32 | 0.00 |

**Table S5.** Soil mechanical composition of the soil at Yakou.

| Layer | $z_h(m)$ | $\Delta z(m)$ | Depth $z_h(m)$ | Sand (%) | Clay (%) |
|-------|----------|---------------|----------------|----------|----------|
| 1     | 0.0071   | 0.0175        | 0.0175         | 48.93    | 5.54     |
| 2     | 0.0279   | 0.0276        | 0.0451         | 48.93    | 5.54     |
| 3     | 0.0623   | 0.0455        | 0.0906         | 61.33    | 6.52     |
| 4     | 0.1189   | 0.0750        | 0.1655         | 73.60    | 8.28     |
| 5     | 0.2122   | 0.1236        | 0.2891         | 72.52    | 8.29     |
| 6     | 0.3661   | 0.2038        | 0.4929         | 13.57    | 1.47     |
| 7     | 0.6198   | 0.3360        | 0.8289         | 14.15    | 1.76     |
| 8     | 1.0380   | 0.5539        | 1.3828         | 14.97    | 2.03     |
| 9     | 1.7276   | 0.9133        | 2.2961         | 15.00    | 2.00     |
| 10    | 2.8646   | 1.5058        | 3.8019         | 15.00    | 2.00     |
